# Supplementary material
Source: Elsevier journal article supplement (https://authors.library.caltech.edu/37616/7/mmc1.zip)
Supplement: mmc1 [file mmc1.zip]

Archive with 1 entries (1 files):
- mmc1.inp
