# Supplementary material
Source: Elsevier journal article supplement (https://authors.library.caltech.edu/37616/7/mmc1.zip)
Supplement: mmc1 [file mmc1.zip › mmc1.inp]

ELEMENTS
AR SI CL
END
SPECIES
SICL4      CL         SICL3     SICL2      CL2        SICL      SI     AR

THERMO
   300.000  1100.000  5000.000
CL                 42189CL  1               G  0300.00   5000.00  1000.00      1
 0.02920236E+02-0.03597985E-02 0.12942943E-06-0.02162776E-09 0.13765171E-14    2
 0.13713381E+05 0.03262690E+02 0.02381576E+02 0.08891079E-02 0.04070475E-05    3
-0.02168943E-07 0.11608274E-11 0.13839987E+05 0.06021817E+02                   4
CL2                42189CL  2               G  0300.00   5000.00  1000.00      1
 0.04274586E+02 0.03717336E-02-0.01893489E-05 0.05337465E-09-0.05057602E-13    2
-0.13311486E+04 0.02256946E+02 0.03439587E+02 0.02870774E-01-0.02385870E-04    3
 0.02892918E-08 0.02915057E-11-0.11317875E+04 0.06471359E+02                   4
SICL              121986SI  1CL  1          G  0300.00   2000.00  1000.00      1
 0.04258459E+02 0.04020317E-02-0.02888145E-05 0.10097771E-09-0.14110117E-13    2
 0.01775613E+06 0.04134521E+02 0.03096406E+02 0.05738623E-01-0.09740903E-04    3
 0.07643597E-07-0.02279178E-10 0.01796794E+06 0.09603212E+02                   4
SICL2             121986SI  1CL  2          G  0300.00   2000.00  1000.00      1
 0.06491204E+02 0.08242384E-02-0.05767737E-05 0.01972405E-08-0.02713757E-12    2
-0.02232408E+06-0.03570531E+02 0.03826666E+02 0.13082964E-01-0.02234087E-03    3
 0.01760741E-06-0.05267404E-10-0.02183869E+06 0.08965448E+02                   4
SICL3             121986SI  1CL  3          G  0300.00   2000.00  1000.00      1
 0.09098097E+02 0.14053526E-02-0.09317005E-05 0.02982296E-08-0.03822010E-12    2
-0.04970193E+06-0.14550117E+02 0.04485690E+02 0.02241754E+00-0.03794196E-03    3
 0.02973183E-06-0.08861335E-10-0.04830264E+06 0.07198771E+02                   4
SICL4             121986SI  1CL  4          G  0300.00   2000.00  1000.00      1
 0.11709377E+02 0.01972091E-01-0.12690771E-05 0.03900188E-08-0.04756468E-12    2
-0.08347808E+06-0.02791153E+03 0.05252110E+02 0.03122067E+00-0.05254593E-03    3
 0.04102707E-06-0.12199071E-10-0.08228177E+06 0.02575727E+02                   4
AR                120186AR  1               G   300.000  5000.000  1000.000    1
 0.02500000E+02 0.00000000E+00 0.00000000E+00 0.00000000E+00 0.00000000E+00    2
-0.07453750E+04 0.04366000E+02 0.02500000E+02 0.00000000E+00 0.00000000E+00    3
 0.00000000E+00 0.00000000E+00-0.07453750E+04 0.04366000E+02                   4
SI                041200SI  1               G  0300.00   5000.00  1000.00      1
 1.75530000E+00 6.28450000E-04-1.29770000E-07 8.90110000E-12 0.00000000E-00    2
 5.41690000E+04 1.07590000E+01 1.75530000E+00 6.28450000E-04-1.29770000E-07    3
 8.90110000E-12 0.00000000E-00 5.41690000E+04 1.07590000E+01                   4
END


REACTIONS


!§§§§§§§§§§§§§§§§§§§§§§§§§§§§§§§§§§§§§§§§§§§§§§§§§§§§§§§§§§§§§§§§§§§§§§
!§§§§§§§§§§§§§§§§§§§§§§§     Reactions of SICLx   §§§§§§§§§§§§§§§§§§§§§
!§§§§§§§§§§§§§§§§§§§§§§§§§§§§§§§§§§§§§§§§§§§§§§§§§§§§§§§§§§§§§§§§§§§§§§


!Reactions of pyrolysis of SICl4

SICL4+CL=SICL3+CL2        1.00E10    0.00          0       ! 28       KUNZ ET ROTH  2001 Int J. Chem. Kinet., vol 33, p 741 (T=1000-2040 K)
SICL4+AR=SICL3+CL+AR      6.90E16    0.00      75000       ! 29       KUNZ ET ROTH  2001 Int J. Chem. Kinet., vol 33, p 741 (T=1500-2400 K) 
SICL4+SI=SICL2+SICL2      4.00e13    0.00          0       ! 30       Kunz, A.; Roth, P. 1998, Ber. Bunsenges. Phys. Chem., vol 102, p 1492 (T=1530-1800 K)
SICL3+AR=SICL2+CL+AR      4.60E15    0.00      65200       ! 31       KUNZ ET ROTH  2001 Int J. Chem. Kinet., vol 33, p 741 (T=1500-3700 K)
SICL2+AR=SICL+CL+AR       5.40E15    0.00      78600       ! 32       KUNZ ET ROTH  2001 Int J. Chem. Kinet., vol 33, p 741 (T=1700-3300 K) 
SICL+AR=SI+CL+AR          1.40E40   -7.00      98000       ! 33       KUNZ ET ROTH  2001 Int J. Chem. Kinet., vol 33, p 741 (T=2300-3700 K)
SI+CL2=SICL+CL            1.99E14    0.00          0       ! 34       Husain, D.; Norris, P.E., 1979 J. Chem. Soc. Faraday Trans. 2, vol 79 (T=300 K)
SI+SICL2=>SICL+SICL       5.60E14    0.00          0       ! 35       KUNZ ET ROTH  2001 Int J. Chem. Kinet., vol 33, p 741 (T=2300-3700 K)
SICL+SICL=>SI+SICL2       1.87E13    0.00          0       ! 36       KUNZ ET ROTH  2001 Int J. Chem. Kinet., vol 33, p 741 (T=2300-3700 K)


!§§§§§§§§§§§§§§§§§§§§§§§§§§§§§§§§§§§§§§§§§§§§§§§§§§§§§§§§§§§§§§§§§§§§§§
!§§§§§§§§§§§§§§§§§§§§§§§§     Reactions of Cl   §§§§§§§§§§§§§§§§§§§§§§§
!§§§§§§§§§§§§§§§§§§§§§§§§§§§§§§§§§§§§§§§§§§§§§§§§§§§§§§§§§§§§§§§§§§§§§§

CL2+M=2CL+M               2.32E13    0.00      46958       ! 49       Moore, Brady and Robbin Martin, Comb & Flame, 2006, vol 146, p 407-418
!AR/ .01/

END
